# Supplementary material
Source: PubMed Central journal article supplement (PMC3837733)
Supplement: AEM.02691-13_zam999104896so1.pdf [file AEM.02691-13_zam999104896so1.pdf]

1 Supplemental Material.

2 **TABLE S1** Primers used for quantification of total bacteria and target bacterial groups in gastrointestinal digesta of weaned pigs

| Bacterial group                                  | Primer (5'-3')            |                        | A <sub>T</sub><br>(°C) | Efficiency<br>( <i>e</i> ) | Amplicon<br>size (bp) | Reference <sup>c</sup> |
|--------------------------------------------------|---------------------------|------------------------|------------------------|----------------------------|-----------------------|------------------------|
|                                                  | Forward                   | Reverse                |                        |                            |                       |                        |
| Universal bacteria                               | CCTACGGGAGGCAGCAG         | ATTACCGCGGCTGCTGG      | 61                     | 2.01                       | 189                   | 1                      |
| <i>Lactobacillus</i> group <sup>a</sup>          | AGCAGTAGGGAATCTTCCA       | CACCGCTACACATGGAG      | 62                     | 2.00                       | 341                   | 2,3                    |
| <i>Enterococcus</i> spp.                         | CCCTTATTGTTAGTTGCCATCATT  | ACTCGTTGTACTTCCCATTGT  | 60                     | 2.00                       | 144                   | 4                      |
| <i>Streptococcus</i> spp.                        | AGAGTTTGATCCTGGCTCAG      | GTTAGCCGTCCCTTTCTGG    | 60                     | 1.94                       | 485                   | 5,6                    |
| <i>Clostridium</i> cluster XIV                   | AAATGACGGTACCTGACTAA      | CTTTGAGTTTCATTCTTGCGAA | 60                     | 1.94                       | 438-441               | 7                      |
| <i>Clostridium</i> cluster IV                    | GCACAAGCAGTGGAGT          | CTTCCTCCGTTTTGTCAA     | 60                     | 2.00                       | 130                   | 8                      |
| <i>Clostridium</i> cluster I                     | ATGCAAGTCGAGCGAKG         | TATGCGGTATTAATCTYCCTTT | 60                     | 2.00                       | 120                   | 4                      |
| <i>Bifidobacterium</i> spp.                      | TCGCGTCYGGTGTGAAAG        | CCACATCCAGCRTCCAC      | 60                     | 1.95                       | 243                   | 4                      |
| <i>Bacteroides-Prevotella-<br/>Porphyromonas</i> | GGTGTCGGCTTAAGTGCCAT      | CGGAYGTAAGGGCCGTGC     | 60                     | 2.01                       | 140                   | 4                      |
| <i>Enterobacteriaceae</i> family <sup>b</sup>    | CATTGACGTTACCCGCAGAAGAAGC | CTCTACGAGACTCAAGCTTGC  | 63                     | 1.97                       | 195                   | 9                      |
| <i>Helicobacter</i> spp.                         | CTATGACGGGTATCCGGC        | ATTCCACCTACCTCTCCCA    | 60                     | 1.96                       | 376                   | 10                     |
| <i>Campylobacter</i> spp.                        | GGATGACACTTTTCGGAG        | AATCCATCTGCCTCTCC      | 61                     | 1.96                       | 246                   | 4                      |
| <i>Fusobacterium</i> spp.                        | CWAACGCGATAAGTAATC        | TGGTAACATACGAWAAGG     | 55                     | 1.95                       | 273                   | 4                      |

3 F, forward; R, reverse; A<sub>T</sub>, annealing temperature.

4 <sup>a</sup> *Lactobacillus* group includes the genera *Lactobacillus*, *Lactococcus*, *Leuconostoc*, *Pediococcus*, *Weissella*.

5 <sup>b</sup> *Enterobacteriaceae* family comprises the genera *Citrobacter*, *Cronobacter*, *Enterobacter*, *Erwinia*, *Escherichia*, *Pantoea*, *Pectobacterium* and *Shigella*.

6 <sup>c</sup> References:

- 7 1. **Muyzer G, de Waal EC, Uitterlinden AG.** 1993. Profiling of complex microbial populations by denaturing gradient gel electrophoresis analysis of  
8 polymerase chain reaction-amplified genes coding for 16S rRNA. *Appl. Environ. Microbiol.*59:695-700.
- 9 2. **Walter J, Hertel C, Tannock GW, Lis CM, Munro K, Hammes WP.** 2001. Detection of *Lactobacillus*, *Pediococcus*, *Leuconostoc*, and *Weissella* species  
10 in human feces by using group-specific PCR primers and denaturing gradient gel electrophoresis. *Appl. Environ. Microbiol.* 67:2578-2585.
- 11 3. **Heilig HGHJ, Zoetendal EG, Vaughan EE, Marteau P, Akkermans ADL, de Vos WM.** 2002. Molecular diversity of *Lactobacillus* spp. and other lactic  
12 acid bacteria in the human intestine as determined by specific amplification of 16S ribosomal DNA. *Appl. Environ. Microbiol.* **68**:114-123.

- 13 4. **Rintillä T, Kassinen A, Malinen E, Krogius L, Palva A.** 2004. Development of an extensive set of 16S rDNA-targeted primers for quantification of  
14 pathogenic and indigenous bacteria in faecal samples by real-time PCR. *J. Appl. Microbiol.* **97**:1166-1177.
- 15 5. **Nübel U, Engelen B, Felske A, Snaidr J, Wieshuber A, Amann RI, Ludwig W, Backhaus HH.** 1996. Sequence heterogeneities of genes encoding 16S  
16 rRNAs in *Paenibacillus polymyxa* detected by temperature gradient gel electrophoresis. *J. Bacteriol.* **178**:5636–5643.
- 17 6. **Franks AH, Harmsen HJ, Raangs GC, Jansen GJ, Schut F, Welling GW.** 1998. Variations of bacterial populations in human feces measured by  
18 fluorescent *in situ* hybridization with group-specific 16S rRNA targeted oligonucleotide probes. *Appl. Environ. Microbiol.* **64**:3336–3345.
- 19 7. **Matsuki T, Watanabe K, Fujimoto J, Miyamoto Y, Takada T, Matsumoto K, Oyaizu H, Tanaka R.** 2002. Development of 16S rRNA-gene targeted  
20 group-specific primers for the detection and identification of predominant bacteria in human feces. *Appl. Environ. Microbiol.* **68**:5445–5451.
- 21 8. **Matsuki T, Watanabe K, Fujimoto J, Takada T, Tanaka R.** 2004. Use of 16S rRNA gene-targeted group-specific primers for real-time PCR analysis of  
22 predominant bacteria in human feces. *Appl. Environ. Microbiol.* **70**:7220–7228.
- 23 9. **Bartosch S, Fite A, Macfarlane GT, McMurdo MET.** 2004. Characterization of bacterial communities in feces from healthy elderly volunteers and  
24 hospitalized elderly patients by using real-time PCR and effects of antibiotic treatment on the fecal microbiota. *Appl. Environ. Microbiol.* **70**:3575-3581.
- 25 10. **Proietti PC, Bietta A, Brachelente C, Lepri E, Davidson I, Franciosini MP.** 2010 Detection of *Helicobacter* spp. in gastric, fecal and saliva samples  
26 from swine affected by gastric ulceration. *J. Vet. Sci.* **11**:221-225.

28 **TABLE S2** Comparison of dry matter content, pH, lactate and SCFA found at different gut sites  
 29 in weaned pigs<sup>a</sup>

| Parameter         | Stomach | Ileum  | Colon  | Feces  | Pooled SEM | P-value |
|-------------------|---------|--------|--------|--------|------------|---------|
| Dry matter (%)    | 26.7 b  | 14.2 d | 20.6 c | 29.5 a | 1.07       | <0.001  |
| pH                | 3.6 c   | 6.1 ab | 5.9 b  | 6.5 a  | 0.14       | <0.001  |
| $\mu\text{mol/g}$ |         |        |        |        |            |         |
| Total lactate     | 21.4 a  | 30.8 a | 0.5 b  | -      | 3.42       | <0.001  |
| D-lactate         | 13.0 a  | 5.8 b  | 0.3 c  | -      | 1.84       | <0.001  |
| L-lactate         | 8.4 b   | 25.6 a | 0.2 c  | -      | 2.80       | <0.001  |
| Total SCFA        |         |        |        | -      |            |         |
| Acetate           | 6.3 b   | 9.0 b  | 70.7 a | -      | 1.75       | <0.001  |
| Propionate        | 2.4 b   | 1.2 b  | 39.3 a | -      | 1.34       | <0.001  |
| Iso-butyrate      | 0.3 b   | 0.3 b  | 1.1 a  | -      | 0.05       | <0.001  |
| Butyrate          | 1.1 b   | 0.7 b  | 18.7 a | -      | 0.58       | <0.001  |
| Iso-valerate      | 0.1 b   | 0.1 b  | 1.0 a  | -      | 0.08       | <0.001  |
| Valerate          | 0.2 b   | 0.1 b  | 3.8 a  | -      | 0.22       | <0.001  |
| Caproate          | 0.2 b   | 0.2 b  | 0.4 a  | -      | 0.07       | <0.001  |

30 Data are presented as least-square means  $\pm$  SEM. Different letters within rows indicate significant difference ( $P <$   
 31 0.05).

32 <sup>a</sup> Mean of  $n = 31$  pigs for stomach,  $n = 27$  pigs for ileum and  $n = 31$  pigs for colon.

33
